# Supplementary material for: Patient satisfaction after hook plate treatment of bony avulsion fracture of the distal phalanges
Source: Springer Nature journal article supplement (doi:10.1186/s40001-018-0332-y), 2018-07-20
Supplement: MOESM1 [file 15966694]

Patienten ID

**Datum:**

**Geschlecht:**

weiblich

männlich

**Geburtsdatum:**

**Welcher Finger ist betroffen?**

rechter

linker

Daumen

Zeigefinger

Mittelfinger

Ringfinger

kleiner Finger

**Sind Sie berufstätig?**

ja → Ihr Beruf: \_\_\_\_\_

nein → aufgrund Ihrer Fingerverletzung?  ja  nein

Rentner

Hausfrau

**Nehmen Sie Medikamente zur Linderung der Beschwerden an Ihrem Finger ein?**

ja

nein

**falls „ja“, welche Medikamente?**

**Womit beschäftigen Sie sich in Ihrer Freizeit? Was sind Ihre Hobbys?**

**1. Wie stark waren die Schmerzen an Ihrem Finger den vergangenen 4 Wochen?**

|   |   |   |   |   |   |   |   |   |   |    |
|---|---|---|---|---|---|---|---|---|---|----|
| 0 | 1 | 2 | 3 | 4 | 5 | 6 | 7 | 8 | 9 | 10 |
|---|---|---|---|---|---|---|---|---|---|----|

keine Schmerzen unerträglich

**2. Wie stark waren die größten Schmerzen an Ihrem Finger in den vergangenen 4 Wochen?**

|   |   |   |   |   |   |   |   |   |   |    |
|---|---|---|---|---|---|---|---|---|---|----|
| 0 | 1 | 2 | 3 | 4 | 5 | 6 | 7 | 8 | 9 | 10 |
|---|---|---|---|---|---|---|---|---|---|----|

keine Schmerzen unerträglich

**3. Wie stark sind die Schmerzen an Ihrem Finger in diesem Moment?**

|   |   |   |   |   |   |   |   |   |   |    |
|---|---|---|---|---|---|---|---|---|---|----|
| 0 | 1 | 2 | 3 | 4 | 5 | 6 | 7 | 8 | 9 | 10 |
|---|---|---|---|---|---|---|---|---|---|----|

keine Schmerzen unerträglich

**4. Wie häufig hatten Sie in den vergangenen 4 Wochen Schmerzen an Ihrem Finger?**

|   |   |   |   |   |   |   |   |   |   |    |
|---|---|---|---|---|---|---|---|---|---|----|
| 0 | 1 | 2 | 3 | 4 | 5 | 6 | 7 | 8 | 9 | 10 |
|---|---|---|---|---|---|---|---|---|---|----|

nie immer

**5. Haben Sie unter Belastung Schmerzen an Ihrem Finger?**

|   |   |   |   |   |   |   |   |   |   |    |
|---|---|---|---|---|---|---|---|---|---|----|
| 0 | 1 | 2 | 3 | 4 | 5 | 6 | 7 | 8 | 9 | 10 |
|---|---|---|---|---|---|---|---|---|---|----|

nie immer

**6. Haben Sie in Ruhe Schmerzen an Ihrem Finger?**

|   |   |   |   |   |   |   |   |   |   |    |
|---|---|---|---|---|---|---|---|---|---|----|
| 0 | 1 | 2 | 3 | 4 | 5 | 6 | 7 | 8 | 9 | 10 |
|---|---|---|---|---|---|---|---|---|---|----|

nie immer

**7. Konnten Sie aufgrund von Schmerzen an Ihrem Finger in den vergangenen 4 Wochen schlechter schlafen?**

|   |   |   |   |   |   |   |   |   |   |    |
|---|---|---|---|---|---|---|---|---|---|----|
| 0 | 1 | 2 | 3 | 4 | 5 | 6 | 7 | 8 | 9 | 10 |
|---|---|---|---|---|---|---|---|---|---|----|

nie immer

**8. Wie oft nehmen Sie Schmerzmittel gegen Ihre Schmerzen am Finger ein?**

|   |   |   |   |   |   |   |   |   |   |    |
|---|---|---|---|---|---|---|---|---|---|----|
| 0 | 1 | 2 | 3 | 4 | 5 | 6 | 7 | 8 | 9 | 10 |
|---|---|---|---|---|---|---|---|---|---|----|

nie immer

**9. Leiden Sie unter Gefühlsstörungen an Ihrem Finger wie Taubheit/Kribbeln/Einschlafen/Pelzigsein?**

|   |   |   |   |   |   |   |   |   |   |    |
|---|---|---|---|---|---|---|---|---|---|----|
| 0 | 1 | 2 | 3 | 4 | 5 | 6 | 7 | 8 | 9 | 10 |
|---|---|---|---|---|---|---|---|---|---|----|

nie immer

**10. Ist Ihr Finger im Vergleich zum Zustand vor der Behandlung geschwollen?**

|   |   |   |   |   |   |   |   |   |   |    |
|---|---|---|---|---|---|---|---|---|---|----|
| 0 | 1 | 2 | 3 | 4 | 5 | 6 | 7 | 8 | 9 | 10 |
|---|---|---|---|---|---|---|---|---|---|----|

keine Schwellung extreme Schwellung

**11. Bemerken Sie Veränderungen am Fingernagel des betroffenen Fingers im Vergleich zum Zustand vor der Behandlung?**

|   |   |   |   |   |   |   |   |   |   |    |
|---|---|---|---|---|---|---|---|---|---|----|
| 0 | 1 | 2 | 3 | 4 | 5 | 6 | 7 | 8 | 9 | 10 |
|---|---|---|---|---|---|---|---|---|---|----|

überhaupt nicht ja, sehr

**12. Mein Finger behindert mich beim Tippen auf einer Tastatur.**

|   |   |   |   |   |   |   |   |   |   |    |
|---|---|---|---|---|---|---|---|---|---|----|
| 0 | 1 | 2 | 3 | 4 | 5 | 6 | 7 | 8 | 9 | 10 |
|---|---|---|---|---|---|---|---|---|---|----|

nie Tippen unmöglich

**13. Mein Finger behindert mich beim Öffnen oder Schließen von Knöpfen an meiner Kleidung.**

|   |   |   |   |   |   |   |   |   |   |    |
|---|---|---|---|---|---|---|---|---|---|----|
| 0 | 1 | 2 | 3 | 4 | 5 | 6 | 7 | 8 | 9 | 10 |
|---|---|---|---|---|---|---|---|---|---|----|

nie Öffnen/Schließen unmöglich

**14. Mein Finger behindert mich beim Schuheschnüren.**

|   |   |   |   |   |   |   |   |   |   |    |
|---|---|---|---|---|---|---|---|---|---|----|
| 0 | 1 | 2 | 3 | 4 | 5 | 6 | 7 | 8 | 9 | 10 |
|---|---|---|---|---|---|---|---|---|---|----|

nie Schnüren unmöglich

**15. Behindert Sie ihr Finger bei der Arbeit?**

|   |   |   |   |   |   |   |   |   |   |       |
|---|---|---|---|---|---|---|---|---|---|-------|
| 0 | 1 | 2 | 3 | 4 | 5 | 6 | 7 | 8 | 9 | 10    |
|   |   |   |   |   |   |   |   |   |   | immer |

nie immer

**16. Behindert Sie Ihr Finger beim Ausüben Ihrer Hobbys (Musik/Sport etc.)?**

|   |   |   |   |   |   |   |   |   |   |       |
|---|---|---|---|---|---|---|---|---|---|-------|
| 0 | 1 | 2 | 3 | 4 | 5 | 6 | 7 | 8 | 9 | 10    |
|   |   |   |   |   |   |   |   |   |   | immer |

nie immer

**17. Wie zufrieden bzw. unzufrieden sind Sie mit der allgemeinen Funktionsfähigkeit Ihres Fingers?**

|   |   |   |   |   |   |   |   |   |   |                     |
|---|---|---|---|---|---|---|---|---|---|---------------------|
| 0 | 1 | 2 | 3 | 4 | 5 | 6 | 7 | 8 | 9 | 10                  |
|   |   |   |   |   |   |   |   |   |   | äußerst unzufrieden |

sehr zufrieden äußerst unzufrieden

**18. Bitte kreuzen Sie jede Ihnen ohne Hilfsmittel einnehmbare Position an.**

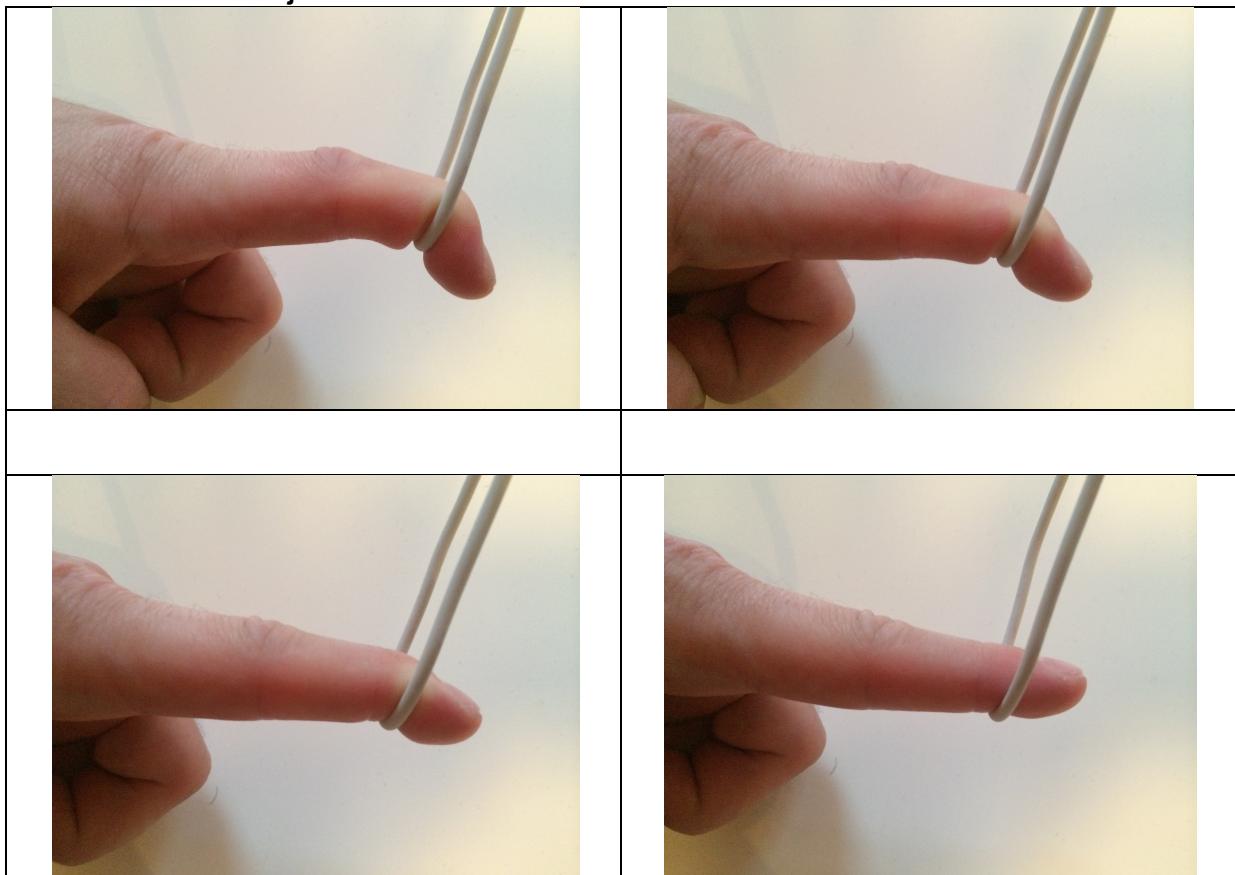

|  |  |
|--|--|
|  |  |
|--|--|

**19. Wie zufrieden bzw. unzufrieden sind Sie mit dem Aussehen Ihres Fingers nach der Behandlung?**

|   |   |   |   |   |   |   |   |   |   |    |
|---|---|---|---|---|---|---|---|---|---|----|
| 0 | 1 | 2 | 3 | 4 | 5 | 6 | 7 | 8 | 9 | 10 |
|---|---|---|---|---|---|---|---|---|---|----|

sehr zufrieden äußerst unzufrieden

**20. Machen Sie sich bezüglich Ihres Fingers Sorgen?**

|   |   |   |   |   |   |   |   |   |   |    |
|---|---|---|---|---|---|---|---|---|---|----|
| 0 | 1 | 2 | 3 | 4 | 5 | 6 | 7 | 8 | 9 | 10 |
|---|---|---|---|---|---|---|---|---|---|----|

nie immer

**21. Sind Sie wegen Ihres Fingers in Ihrer Lebensqualität eingeschränkt?**

|   |   |   |   |   |   |   |   |   |   |    |
|---|---|---|---|---|---|---|---|---|---|----|
| 0 | 1 | 2 | 3 | 4 | 5 | 6 | 7 | 8 | 9 | 10 |
|---|---|---|---|---|---|---|---|---|---|----|

überhaupt nicht ja, sehr

**22. Wie zufrieden bzw. unzufrieden sind Sie mit dem Ergebnis der Behandlung?**

|   |   |   |   |   |   |   |   |   |   |    |
|---|---|---|---|---|---|---|---|---|---|----|
| 0 | 1 | 2 | 3 | 4 | 5 | 6 | 7 | 8 | 9 | 10 |
|---|---|---|---|---|---|---|---|---|---|----|

sehr zufrieden äußerst unzufrieden

**23. Würden Sie sich im Falle einer erneuten Verletzung wieder für die bei Ihnen vorgenommene Behandlungsmethode entscheiden?**

|   |   |   |   |   |   |   |   |   |   |    |
|---|---|---|---|---|---|---|---|---|---|----|
| 0 | 1 | 2 | 3 | 4 | 5 | 6 | 7 | 8 | 9 | 10 |
|---|---|---|---|---|---|---|---|---|---|----|

immer niemals

**24. (Falls die bei Ihnen eingesetzte Hakenplatte noch nicht entfernt wurde:) Fühlen Sie sich durch das an Ihrem Finger angebrachte Fremdmaterial beeinträchtigt?**

|   |   |   |   |   |   |   |   |   |   |    |
|---|---|---|---|---|---|---|---|---|---|----|
| 0 | 1 | 2 | 3 | 4 | 5 | 6 | 7 | 8 | 9 | 10 |
|---|---|---|---|---|---|---|---|---|---|----|

nie immer
